# Supplementary material
Source: Springer Nature journal article supplement (https://www.springermedizin.de/resource/supplementary/12967_2010_735_MOESM4_ESM.pdf/9577410)

**A**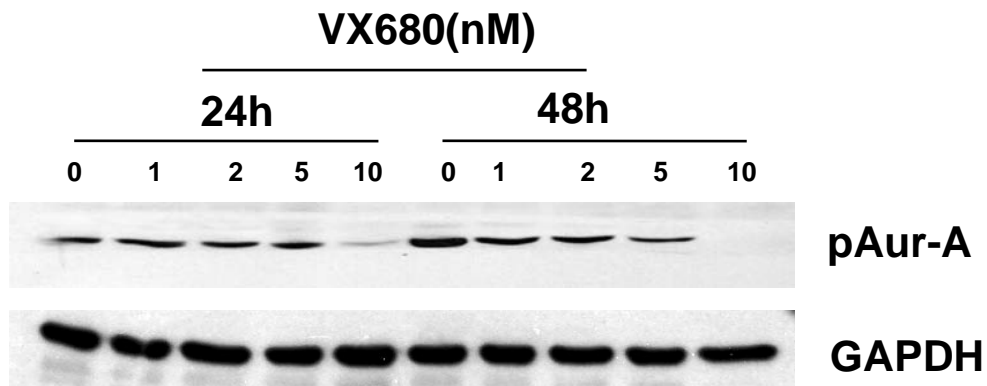**B**

**DAPI    $\alpha$ -tubulin   Aur-A   Merge**

**control**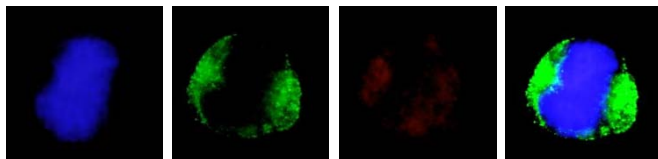**VX-680  
(2nM)**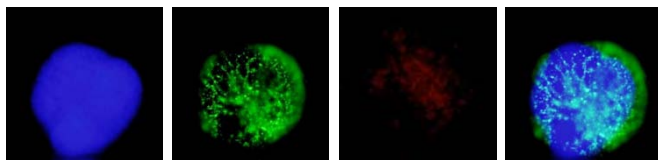

Supplement: MOESM4 [file 9577410]
